# Supplementary material for: Engineering thermally activated NiMoO4 nanoflowers and biowaste derived activated carbon-based electrodes for high-performance supercapatteries
Source: Royal Society of Chemistry journal article supplement (doi:10.1039/c9qi01085h), 2019-10-31
Supplement: c9qi01085h1.pdf [file c9qi01085h1.pdf]

**Supplementary material**

**Engineering thermally activated NiMoO<sub>4</sub> nanoflowers and  
biowaste derived activated carbon-based electrodes for high-  
performance supercapatteries**

C. Justin Raj<sup>a</sup>, Ramu Manikandan<sup>b</sup>, Kook Hyun Yu<sup>a</sup>, Goli Nagaraju<sup>c, d</sup>, Myung-Soo Park<sup>e</sup>,  
Dong-Won Kim<sup>e</sup>, Sang Yeup Park<sup>f</sup>, Byung Chul Kim<sup>b\*</sup>

<sup>a</sup> *Department of Chemistry, Dongguk University, Jung-gu, Seoul-04620, Republic of Korea.*

<sup>b</sup> *Department of Printed Electronics Engineering, Sunchon National University, 255,  
Jungang-ro, Suncheon-si, Jellanamdo 57922, Republic of Korea.*

<sup>c</sup> *Department of Chemical Engineering, College of Engineering, Kyung Hee University, 1732  
Deogyong-daero, Gihung-gu, Yongin-si, Gyeonggi-do 44670, Republic of Korea.*

<sup>d</sup> *School of Chemistry, Trinity College Dublin, Dublin2, Ireland.*

<sup>e</sup> *Department of Chemical Engineering, Hanyang University, Seungdong-gu, Seoul-04763,  
Republic of Korea.*

<sup>f</sup> *Department of Ceramic Engineering, Gangneung-Wonju National University, Gangneung-  
25457, Republic of Korea.*

\* Corresponding author, E-mail: bckim@sncu.ac.kr (B.C. Kim)

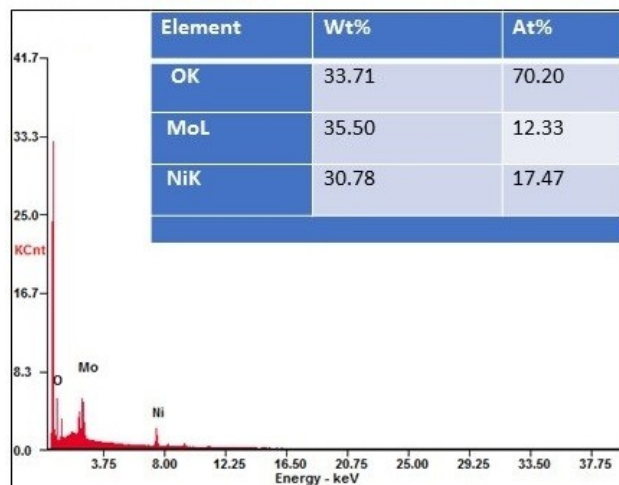

**Fig. S1.** EDX spectrum of NMO-500 samples and inset table shows the wt.% and At.% of elements exist in the scanned area of the sample.

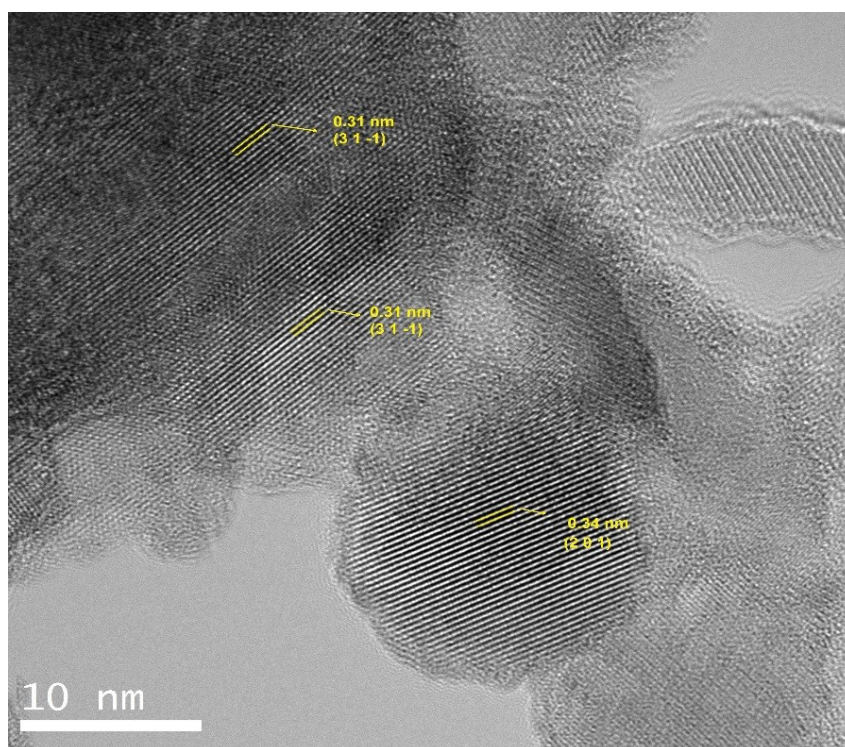

**Fig. S2.** HRTEM image of NMO-500 samples

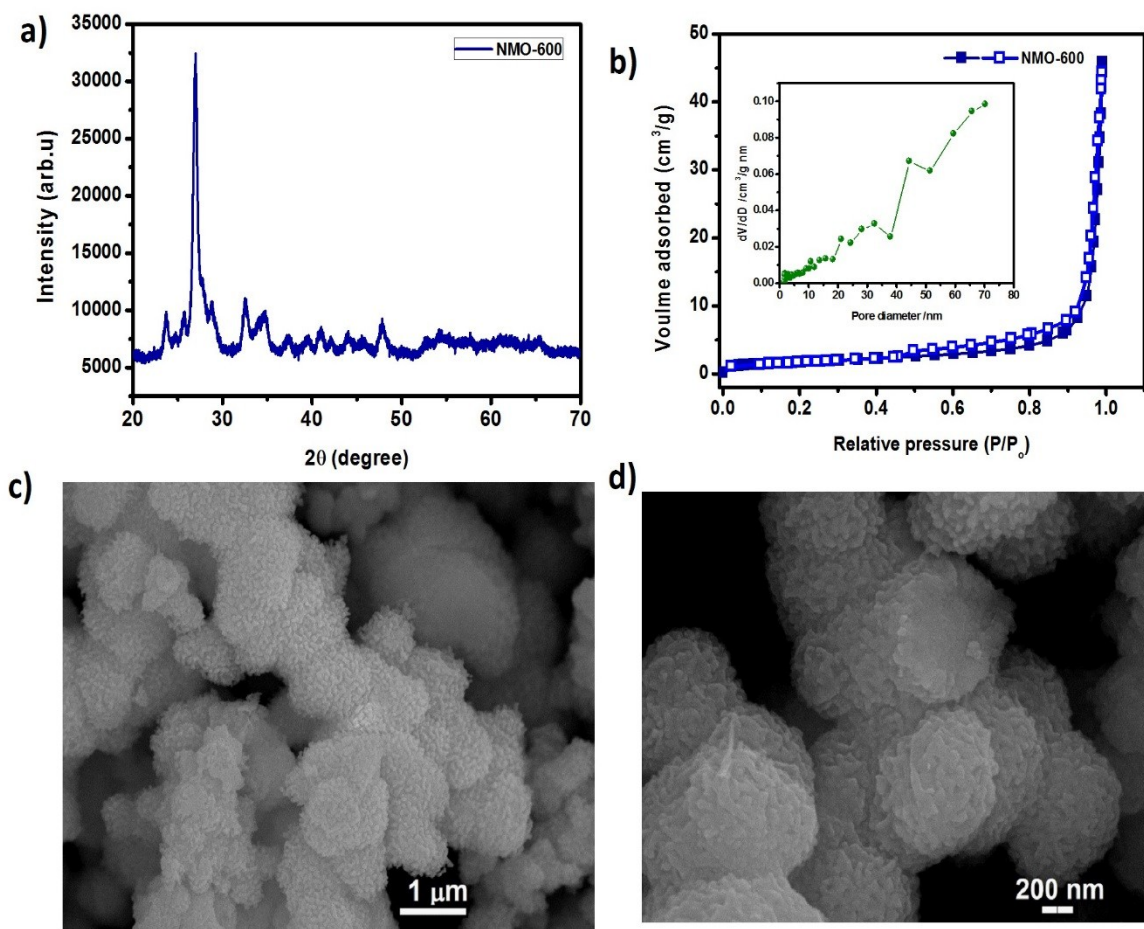

**Fig. S3.** a) XRD pattern of NMO-600 sample showing good crystalline nature of the sample, b) N<sub>2</sub> adsorption/desorption isotherms of the NMO-600 and the inset shows the pore size distribution of the sample, c) and d) the low and high magnification SEM images of NMO-600 sample.

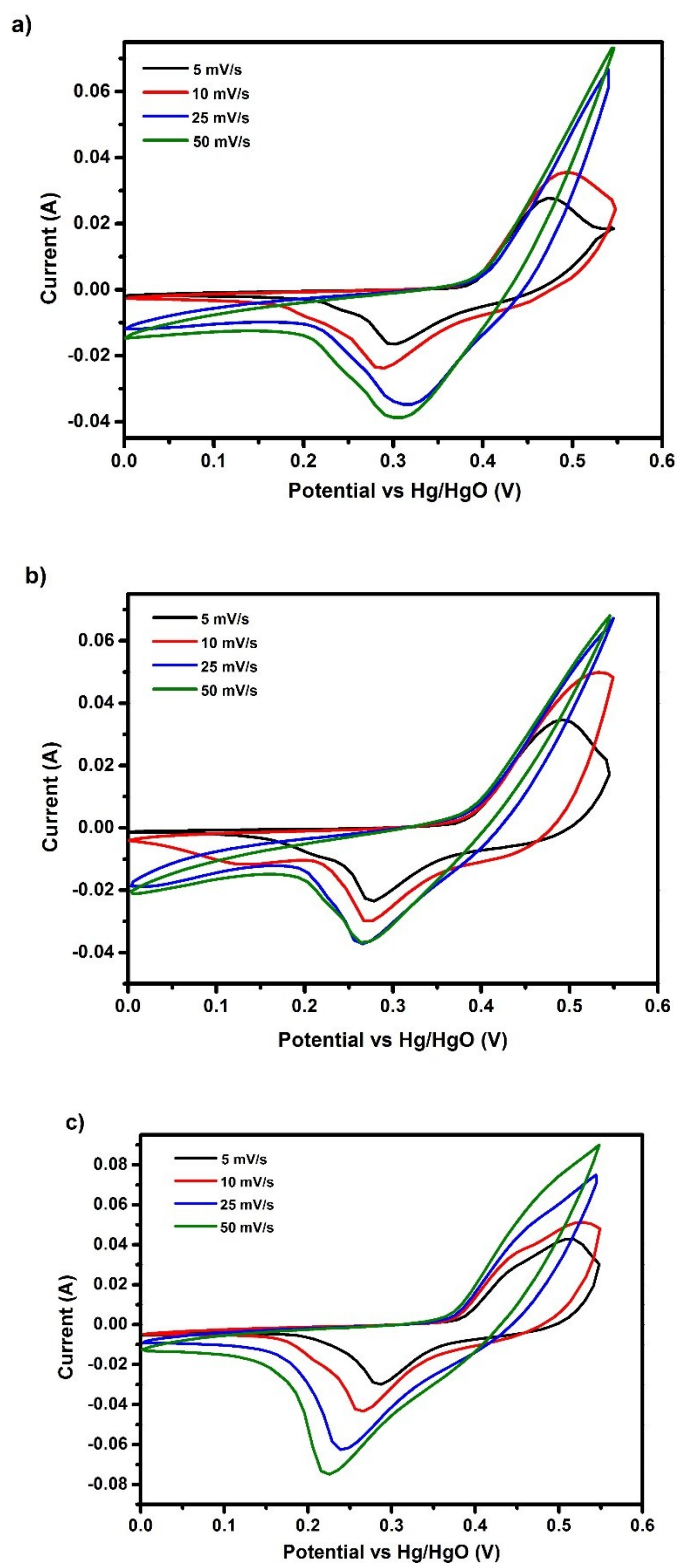

**Fig. S4.** CVs of the NMO-bare, NMO-400 and NMO-500 electrodes in 6M KOH

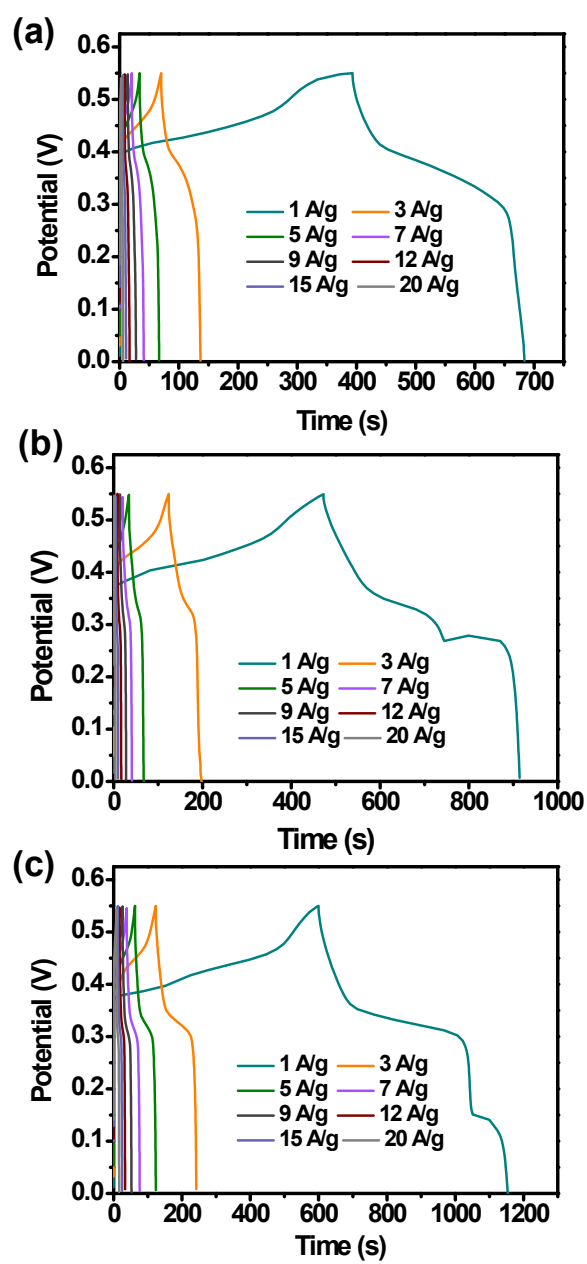

**Fig. S5.** Charge/discharge curves of the NMO-bare, NMO-400 and NMO-500 electrodes in 6M KOH

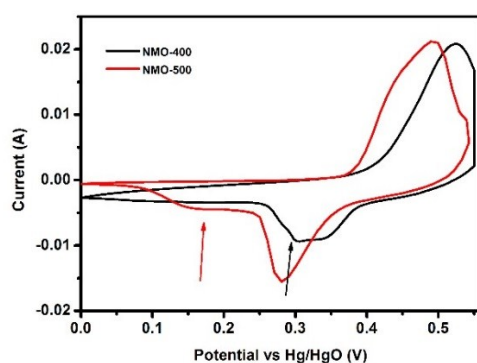

**Fig. S6.** CVs of the NMO-400 and NMO-500 electrodes at scan rate  $2 \text{ mVs}^{-1}$

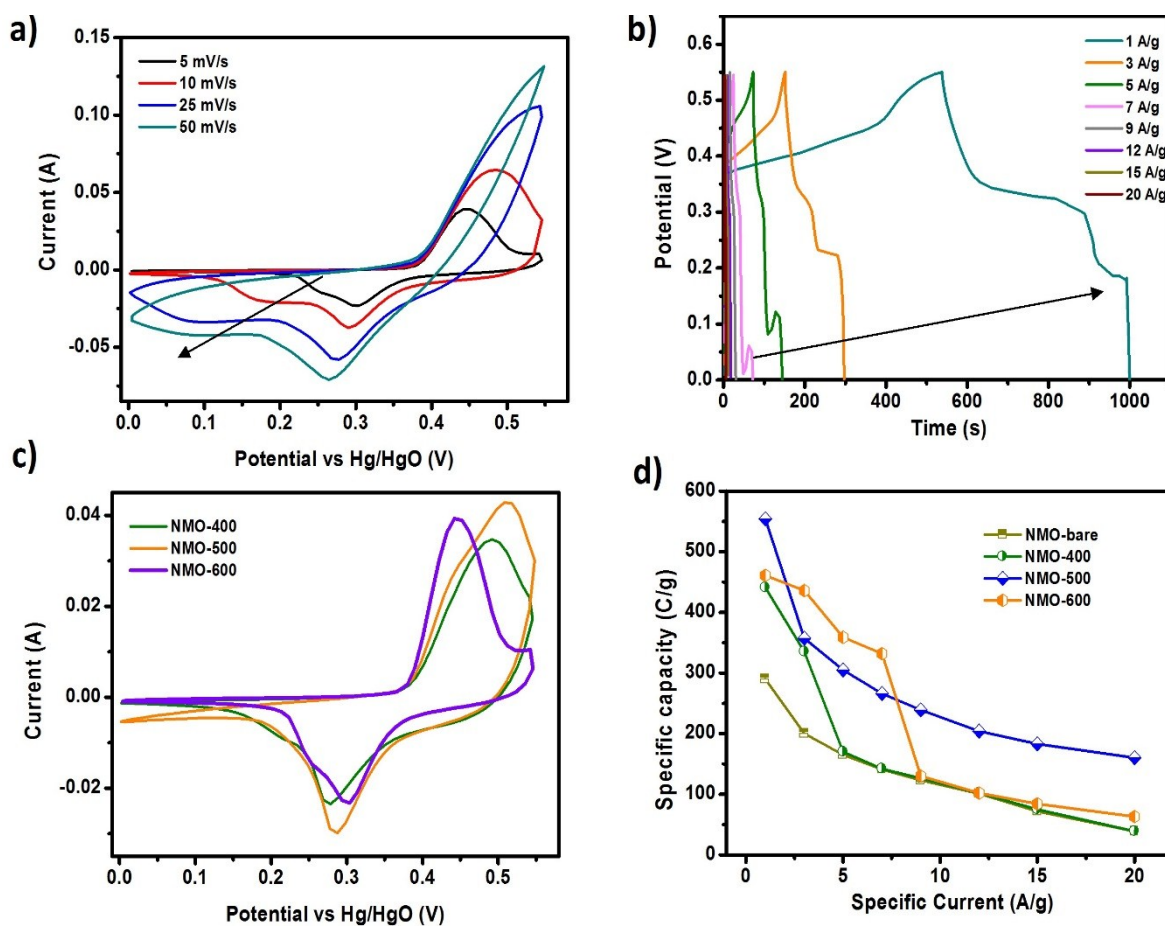

**Fig. S7.** a) CVs of the NMO-600 electrode in 6M KOH for various scan rates highlighting the secondary reduction peak, b) Charge/discharge curves of the NMO-600 electrode for different specific currents highlighting the discharge plateau, c) CVs of the NMO-400, NMO-500 and NMO-600 electrodes, d) comparison of the specific capacity variation of the NMO-bare, NMO-400, NMO-500 and NMO-600 electrodes.

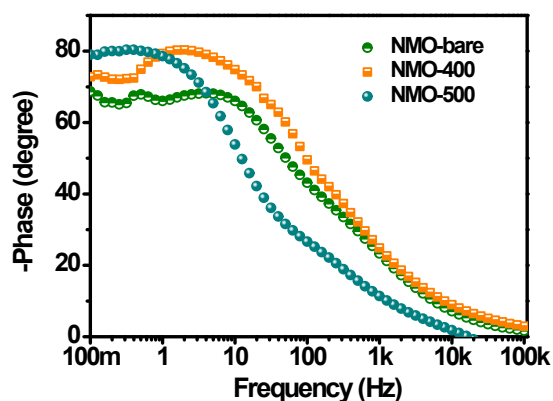

**Fig. S8.** Bode plots of NMO-bare, NMO-400 and NMO-500 electrodes

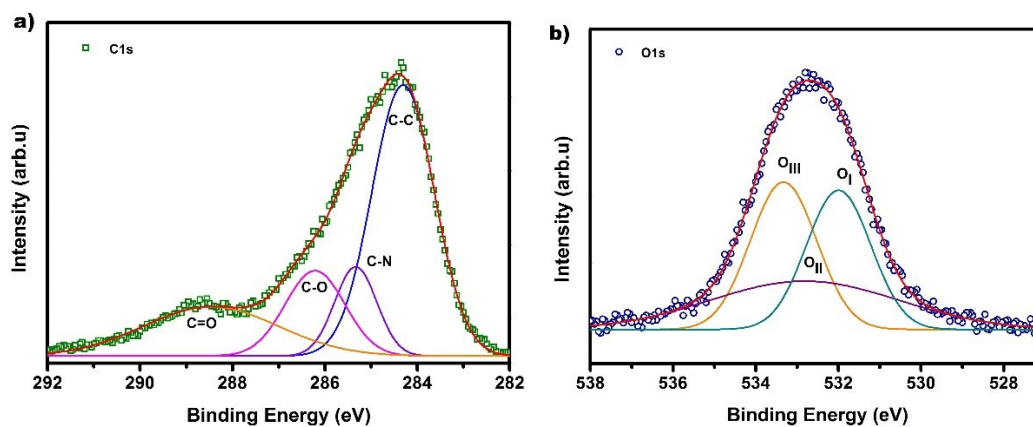

**Fig. S9.** a) The magnified C1s XPS spectrum of O,N-AC sample, the four peaks at 284.3, 285.3, 286.2 and 288.5 eV represents the C-C, C-N, C-O and C=O groups present in the sample; b) The magnified O1s spectrum of O,N-AC sample, the peaks O<sub>I</sub> (531.9 eV), O<sub>II</sub> (532.8 eV) and O<sub>III</sub> (533.3 eV) corresponds to the O=C quinone type group, C-O-H Phenol or C-O-C ester group and chemisorbed oxygen or water molecules bonded to the carbon atoms

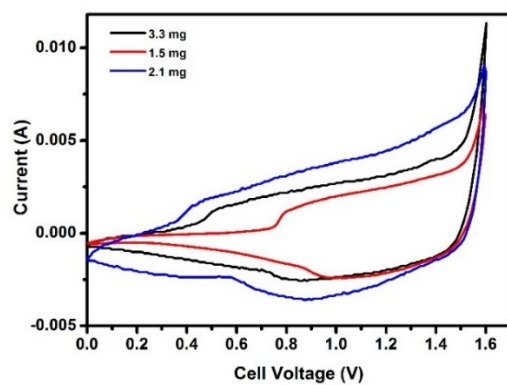

**Fig. S10.** CVs of the supercapacities at scan rate  $5 \text{ mVs}^{-1}$  for various mass of active material in the positive electrode; the negative electrode mass was fixed ( $\sim 2 \text{ mg}$ ).

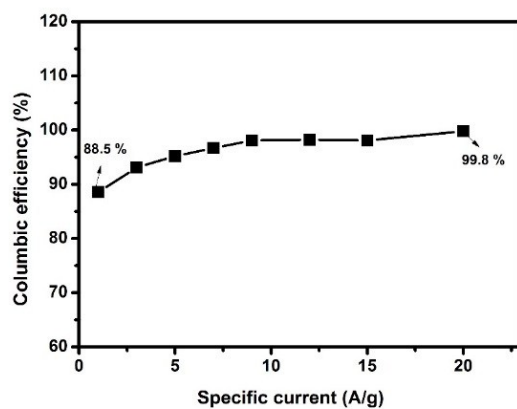

**Fig. S11.** Variation of columbic efficiency of the supercapacitor with various specific currents.
